# Supplementary material
Source: PubMed Central journal article supplement (PMC4524215)
Supplement: JVI.00572-15_zjv999090668so1.pdf [file JVI.00572-15_zjv999090668so1.pdf]

Sup Fig 1

A.

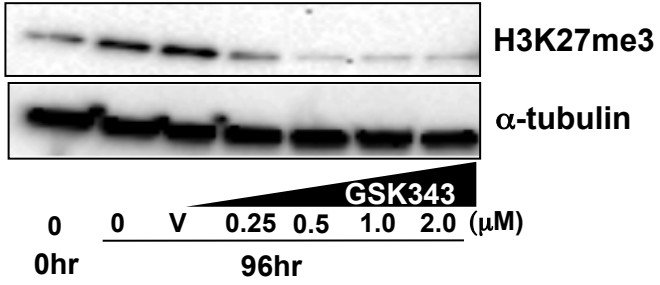

B.

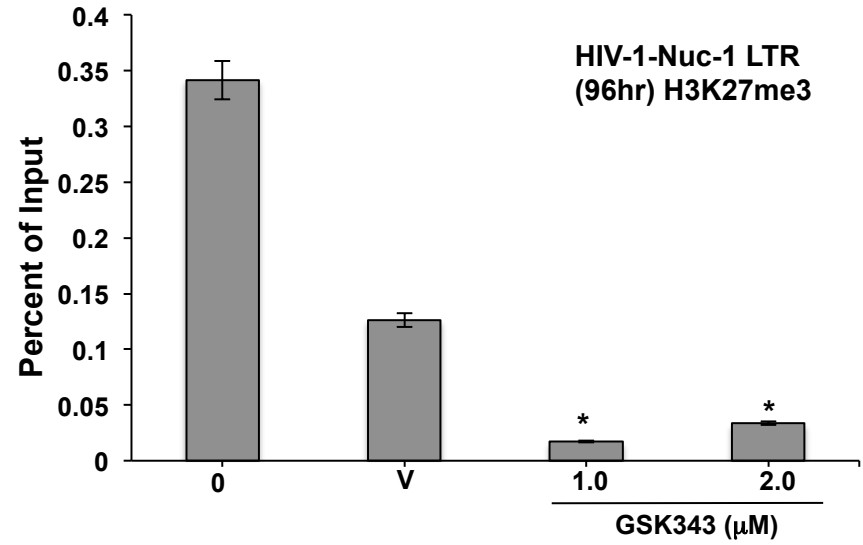

C.

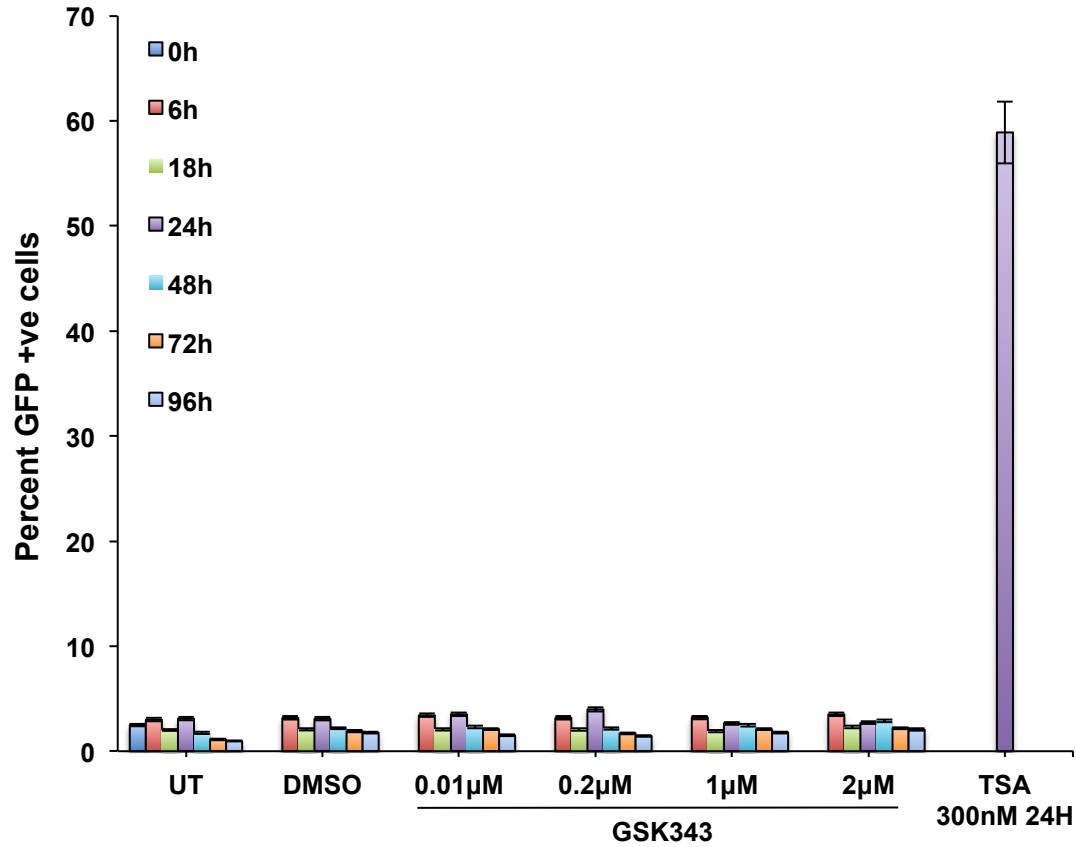

D.

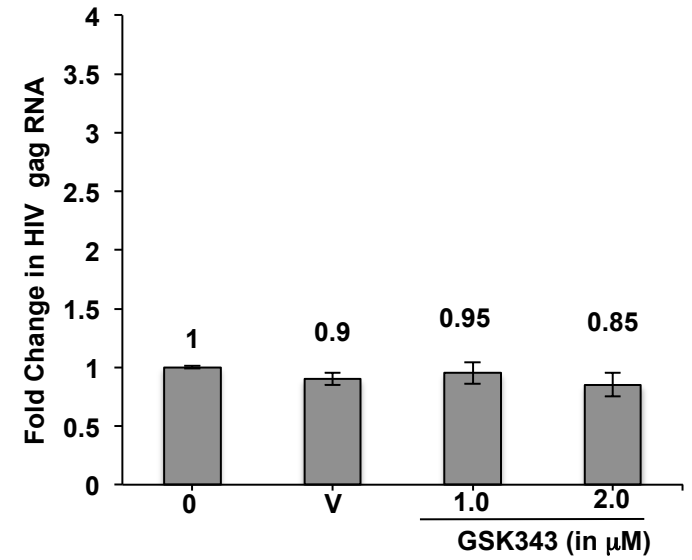

Sup Fig 2

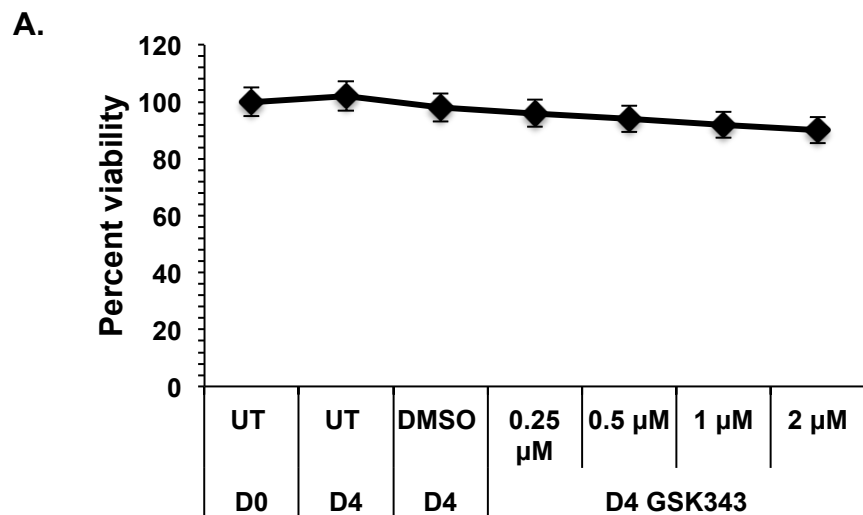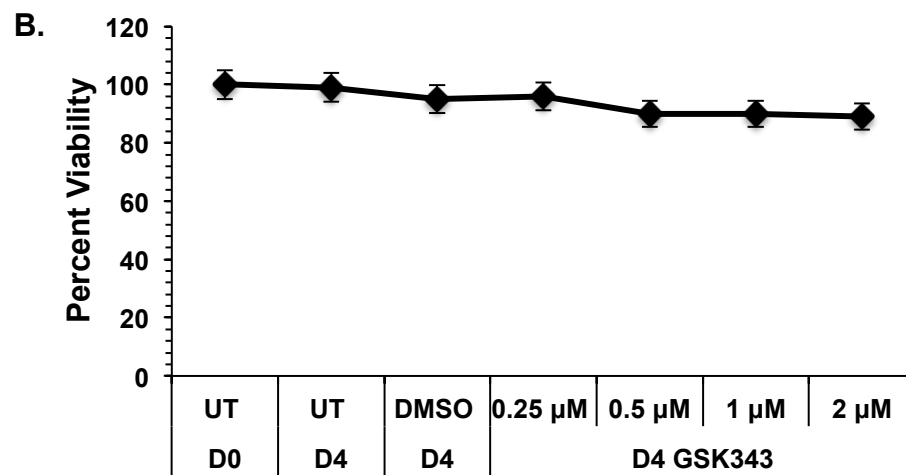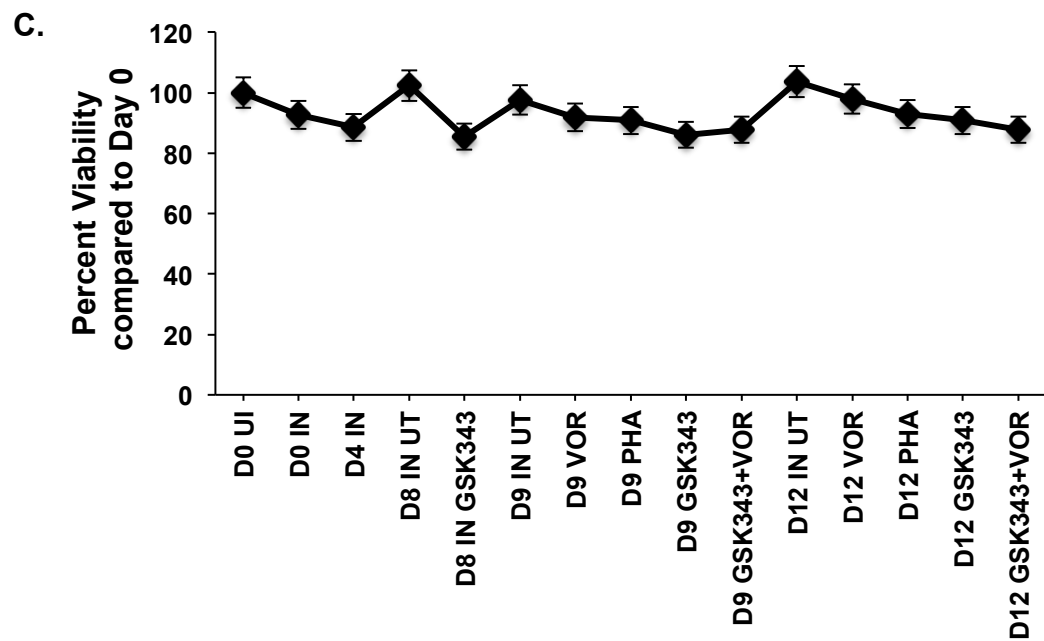

1 **Sup Fig 1. EZH2 inhibitor GSK343 leads to a reduction of trimethylated H3K27 in**  
2 **Jurkat J-89 model of latency without proviral activation:** **A.** A western blot showing  
3 global reduction in H3K27me3 in whole cell lysate at different concentrations of  
4 GSK343 as indicated for 96 hrs. Histone H3 and  $\alpha$ -tubulin are shown as loading controls.  
5 (V: vehicle control, 0.02% DMSO) **B.** ChIP at HIV LTR Nuc-1 promoter for H3K27me3  
6 normalized to HA as an unrelated isotype control and total Histone H3 occupancy at 96 h.  
7 Results were compared with cells treated with vehicle control DMSO using Student  
8 paired t-test. Error bars represent SEM; n = 3. \*p < 0.05. **C.** Flow cytometry measuring  
9 proviral activation (% GFP-positive) in untreated (UT), DMSO (V) and GSK343 treated  
10 at the indicated concentrations for 0-96 hrs. TSA (300 nM) treatment for 24h serves as a  
11 positive control. **D.** The relative fold change of cell-associated *gag* RNA expression upon  
12 GSK343 exposure, normalized to GAPDH, as measured by quantitative RT-PCR at 96hr.  
13 Untreated (0), DMSO vehicle control (V). Mean and SEM of three independent  
14 experiments.

15

16 **Sup Fig 2. Viability following GSK343 exposure by MTT Assay:** **A)** 2D10s as  
17 described in Fig 2A; **B)** PBMCs as in Fig 6; **C)** Resting T- cell latency model as  
18 described in Fig 7.

19

| <b>Target</b>   | <b>Primers (F and R) and probe (P) sequences- (5'-3')</b>                                                                                     |
|-----------------|-----------------------------------------------------------------------------------------------------------------------------------------------|
| Nuc-0           | <b>F- ACA CAC AAG GCT ACT TCC CTG A</b><br><b>R-TCT ACC TTA TCT GGC TCA ACT GGT</b>                                                           |
| Nuc-1           | <b>F-CTG GGA GCT CTC TGG CTA ACT A</b><br><b>R- TTA CCA GAG TCA CAC AAC AGA CG</b>                                                            |
| Gag (ChIP)      | <b>F-AGA TAA AAG ACA CCA AGG A</b><br><b>R- GGC CTG ATG TAC CAT TTG C</b>                                                                     |
| GAPDH<br>(ChIP) | <b>F-TGA GCA GAC CGG TGT CAC TA</b><br><b>R-AGG ACT TTG GGA ACG ACT GA</b>                                                                    |
| SAT2            | <b>GPH110003C(+)-01A (QIAGEN)</b>                                                                                                             |
| MyoD1           | <b>GPH110002C(+)-01A (QIAGEN)</b>                                                                                                             |
| Gag (RT-PCR)    | <b>F -ACA TCA AGC AGC CAT GCA AAT</b><br><b>R-TCT GGC CTG GTG CAA TAG G</b><br><b>P- /FAM/CTA TCC CAT TCT GCA GCT TCC TCA TTG ATG/BHQ-1/</b>  |
| GAPDH (RT-PCR)  | <b>F -GCA CCA CCA ACT GCT TAG CAC C</b><br><b>R-TCT TCT GGG TGG CAG TGAT G</b><br><b>P- /HEX/ TCG TGG AA GGA CTC ATG ACC ACA GTC C/BHQ-1/</b> |
| GFP (RT-PCR)    | <b>F- GGA GCG CAC CAT CTT CA</b><br><b>R- AGG GTG TCG CCC TCG AA</b><br><b>P- /FAM/ CTA CAA GAC CCG CGC CGA GGT G /BHQ-1/</b>                 |
